# Supplementary material for: Genome-wide identification and expression analysis of ethylene responsive factor family transcription factors in Juglans regia
Source: PeerJ journal article supplement (doi:10.7717/peerj.12429), 2021-11-19

```

* : : : * * : *
AT3G14230 ESAEQAEKSSKRKRKNQYRGIRQRPWGKWAAEIRDPE---RKGSRVWLGTFDTAEAAAARAYDAAARRIRG-----TKAKVNFPEEKNPSV 191
AT1G53910 GLDGDAAEKSANRRKRKNQYRGIRQRPWGKWAAEIRDPE---REGARIWLGTFKTAEEAAARAYDAAARRIRG-----SKAKVNFPEE-NMKA 187
JrERF01 ESNQQA EKSAKRKRKNQYRGIRQRPWGKWAAEIRDPE---RKGVRVWLGTFNTAEAAAARAYDAEAFKIRG-----KKAKVNFPEE--SAR 172
AT1G72360 HHASGSASDGKKKQSSRYKGI RRRPWGRWAAEIRDPE---IKGVRVWLGTFNTAEAAAARAYDLEAKRIRG-----AKAKLNFPNE----- 134
JrERF28 GVHEEEKKPAKRQRKNLYRGIRQRPWGKWAAEIRDPE---RKGVRVWLGTFNTAEAAAARAYDREARKIRG-----KKAKVNFPEE--SAR 139
AT2G47520 -VSEE--RDGKRERKNLYRGIRQRPWGKWAAEIRDPE---SKGVRVWLGTFKTADEAAARAYDVAAIKIRG-----RKAKLNFPN----- 107
JrERF05 SQAEEKKESCQRTKRNLYRGIRQRPWGKWAAEIRDPE---HKGVRVWLGTYNTAEAAAARAYDVAEAKRIRG-----DKAKLNFAKL----- 147
AT3G16770 EQATEPGK--RRKRKNLYRGIRKRKPWGKWAAEIRDPE---RKGVRVWLGTFNTAEAAAAMAYDVAAKQIRG-----DKAKLNFPDL----- 137
JrERF06 -----EENPKKEKSYRGVRRRPPWGKYAAAEIRDST---RRGIRVWLGTFDSAEAAAALAYDQAAFSMRG-----ALAVLNFPVEVVRES 172
AT3G23240 -----KSEKSYRGVRRRPPWGKFAAAEIRDST---RNGIRVWLGTFESAEAAAALAYDQAAFSMRG-----SSAILNFSAEERVQES 146
AT2G31230 -----KVGIDEERSYRGVRRRPPWGKFAAAEIRDST---RNGIRVWLGTFDKAEAAAALAYDQAAFAIKG-----SLATLNFPVEVVRES 150
AT1G06160 -----KS YRGVRRRPPWGKFAAAEIRDST---RKGIRVWLGTFDTAEAAAALAYDQAAFAIKG-----SLAVLNFPADVVRES 146
AT1G04370 -----YRGVRRRPPWGKYAAAEIRDST---KHGERVWLGTFDTAEADAARAYDRAAFVSMRG-----KAAILNFPHEVYNGM-- 83
AT3G23220 -----YRGVRRRPPWGKYAAAEIRDSA---RHGARVWLGTFNTAEADAARAYDRAAFVSMRG-----QRAILNFPHEVYQMMK 78
AT3G23230 -----KQARFRGVRRRRPPWGKFAAAEIRDPS---RNGARLWLGTFETAEEAAARAYDRAAFNLRG-----HLAILNFP----- 77
AT4G18450 -----SRVSKTRKYRGVRRRPPWGKFAAAEIRDST---RNGVRVWLGTFQTAEEAAAMAYDKAAVIRGT-----QKAHTNFQLETVIKA 175
AT5G07580 QSVKKAERFEEVVDARHYRGVRRRPPWGKFAAAEIRDPA---KKGSRVWLGTFESDVAARAYDCAAFKLRG-----RKAVLNFPDLAGKYE 174
AT5G61590 SNRKKTKRFEET--RHYRGVRRRPPWGKFAAAEIRDPA---KKGSRVWLGTFESDIDAARAYDYAAFKLRG-----RKAVLNFPDLAGKYD 171
JrERF27 GSIVKVSDCGYQQQGRHYRGVRRRPPWGKFAAAEIRDPT---RNGRRVWLGTFDTDVAADAKAYDCAAFKMRG-----RKAILNFPLEAGVST 178
AT5G47230 TKP-----VSEEEKKHYRGVRRRPPWGKFAAAEIRDPN---KRGSRVWLGTFDTAEIAEAAARAYDEAAFRLRG-----SKAILNFPLEVGKWK 220
AT4G17490 PVPV-----VAAEKKHYRGVRRRPPWGKFAAAEIRDPT---RRGTRVWLGTFETAIEEAAARAYDKEAFRLRG-----SKAILNFPLEVDKWN 201
JrERF38 SSLSSVEQNASFEAKKHYRGIRQRPWGKYAAAEIRDPN---RRGSRVWLGTFDTAEIAEAAKAYDRAAFKLRG-----SKAILNFPLEVGNSD 248
AT5G51190 -----NDQ--RHYRGVRRRPPWGKYAAAEIRDPN---KKGVRVWLGTFDTAMEAARAYDKAAFLKLRG-----SKAILNFPLEAGKHE 136
AT5G61600 -----KEEEERHYRGVRRRPPWGKYAAAEIRDPN---KKGCRVWLGTYDTAVEAAGRAYDCAAFKLRG-----RKAILNFPDLDVRVTS 152
AT4G17500 T-----AAKGKHYRGVRRRPPWGKFAAAEIRDPA---KNGARVWLGTFETAEDAALAYDRAAFRMRG-----SRALLNFPPLRVNSGE 212
AT5G47220 T-----AVKAKHYRGVRRRPPWGKFAAAEIRDPA---KNGARVWLGTFETAEDAALAYDIAAFRMRG-----SRALLNFPPLRVNSGE 181
JrERF37 PSQKEAAPLVVPAK GKHYRGVRRRPPWGKFAAAEIRDPA---KNGARVWLGTFETAEDAALAYDRAAFRMRG-----SRALLNFPPLRVNSGE 221
AT2G44840 -----RQKGMQYRGVRRRPPWGKFAAAEIRDPK---KNGARVWLGTYETPEDAARAYDRAAFQLRG-----SKAKLNFPHLIGSCK 156
JrERF41 PSENSVSNEETGERRRRYRGVRRRPPWGKWAAEIRDPE---HKAARVWLGTFDTAEAAAARAYDEAALRFRG-----SRAKLNFP----- 242
AT5G50080 -----EEAREKRRRYRGVRRRPPWGKWAAEIRDPE---HRAARVWLGTFDTAEAAAARAYDEAALRFRG-----NKAKLNFP----- 133
JrERF15 PAYEYNKETYTEEP RRRYRGVRRRPPWGKWAAEIRDPE---FKAARVWLGTFDTAEAAAQAYDEAALRFRG-----NKAKLNFP----- 244
AT1G43160 -----KKYRGVRRRPPWGKWAAEIRDPE---HKATRVWLGTFETAEEAAARAYDAAALRFRG-----SKAKLNFP----- 117
AT5G64750 TASSETSSFSGDQPRRRYRGVRRRPPWGKWAAEIRDPE---FKAARVWLGTFDTNAESAARAYDEAALRFRG-----NKAKLNFP----- 241
JrERF25 -----RHYRGVRRRPPWGKWAAEIRDPE---KKAARVWLGTFDTAEADAALAYDRAALRFRG-----AKAKLNFP----- 112
AT5G13330 -----RHYRGVRRRPPWGKWAAEIRDPE---KKAARVWLGTFETAEEAAALAYDRAALKFKG-----TKAKLNFP----- 95
AT5G07310 -----RHYRGVRRRPPWGKWAAEIRDPE---QKAARVWLGTFETAEEAAALAYDNAAALKFKG-----SKAKLNFP----- 148
AT5G61890 -----RHYRGVRRRPPWGKWAAEIRDPE---KKAARVWLGTFETAESAALAYDEAALKFKG-----SKAKLNFP----- 146
AT1G12980 -----YRGVRRRPPGRYAAAEIRDPE---MSKERRWLGTFDTAEQAACAYDSAAAFRFRG-----AKARTNFYPTAVIM 120
AT2G33710 -----YRGVRRRPPWGKWAAEIRDPE---NKAARVWLGTFDTAEAAAALAYDKAAFEFRG-----HKAKLNFP----- 126
AT2G20350 -----HKGVRKPKSGKWAAEIWDPE---SLKVRVWLGTFPTAEEMAAKAYDNAAAFFVG-----RRS----- 138
AT5G67000 -----YKGVRRKPKSGKWAAEIWDPE---RSKSRVWLGTFFLTAEMAAQSYNDAAAAYR-----R----- 168
AT5G67010 -----HKGVRKPKSGKWSAEIWDPE---STRTRVWLGTFPTAEEMAADAYDEAAAALVE-----KRS----- 141
JrERF02 -----KKEKRNLYRGVRRRPPWGKWAAEIRDPE---RRAVRVWLGTFATAEQAAARAYDRAAIEFRG-----TRAKLNFP----- 177
ruler 0.....270.....280.....290.....300.....310.....320.....330.....340.....350.....360.....

```

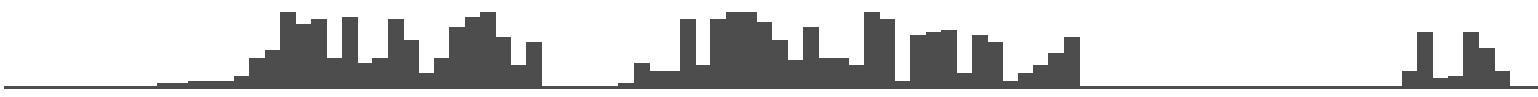

| Accession | Sequence                                   | Accession | Sequence                                 | Accession | Sequence                                   | Accession | Sequence                                   | Accession | Sequence                                |         |                                          |         |                                            |         |                                       |         |                                        |         |                               |         |                                        |         |                                          |         |                                         |         |                                       |         |                                          |         |                                        |         |                                         |         |                                         |         |                                  |           |                                   |           |                                  |           |                                  |         |                                  |           |                                  |           |                                   |           |                                    |         |                                    |         |                                   |         |                                 |           |                                    |         |                                   |         |                                   |         |                                  |         |                                 |           |                                  |           |                                   |         |                                   |           |                                    |           |                                   |           |                                          |           |                              |           |                                          |           |                                   |   |                                         |     |                    |     |                    |     |                   |     |                   |     |                   |     |                   |     |                   |     |                   |     |                   |    |                   |    |                    |    |                   |    |                   |    |                   |     |                      |    |                     |     |                     |     |                     |    |                   |    |                     |    |                     |    |                     |    |                     |    |                    |    |                    |    |                     |    |                     |    |                       |    |                     |    |                     |    |                     |    |                     |    |                   |    |                      |    |                       |    |                      |    |                     |     |                    |    |                    |     |                     |    |                     |     |                     |    |                     |
|-----------|--------------------------------------------|-----------|------------------------------------------|-----------|--------------------------------------------|-----------|--------------------------------------------|-----------|-----------------------------------------|---------|------------------------------------------|---------|--------------------------------------------|---------|---------------------------------------|---------|----------------------------------------|---------|-------------------------------|---------|----------------------------------------|---------|------------------------------------------|---------|-----------------------------------------|---------|---------------------------------------|---------|------------------------------------------|---------|----------------------------------------|---------|-----------------------------------------|---------|-----------------------------------------|---------|----------------------------------|-----------|-----------------------------------|-----------|----------------------------------|-----------|----------------------------------|---------|----------------------------------|-----------|----------------------------------|-----------|-----------------------------------|-----------|------------------------------------|---------|------------------------------------|---------|-----------------------------------|---------|---------------------------------|-----------|------------------------------------|---------|-----------------------------------|---------|-----------------------------------|---------|----------------------------------|---------|---------------------------------|-----------|----------------------------------|-----------|-----------------------------------|---------|-----------------------------------|-----------|------------------------------------|-----------|-----------------------------------|-----------|------------------------------------------|-----------|------------------------------|-----------|------------------------------------------|-----------|-----------------------------------|---|-----------------------------------------|-----|--------------------|-----|--------------------|-----|-------------------|-----|-------------------|-----|-------------------|-----|-------------------|-----|-------------------|-----|-------------------|-----|-------------------|----|-------------------|----|--------------------|----|-------------------|----|-------------------|----|-------------------|-----|----------------------|----|---------------------|-----|---------------------|-----|---------------------|----|-------------------|----|---------------------|----|---------------------|----|---------------------|----|---------------------|----|--------------------|----|--------------------|----|---------------------|----|---------------------|----|-----------------------|----|---------------------|----|---------------------|----|---------------------|----|---------------------|----|-------------------|----|----------------------|----|-----------------------|----|----------------------|----|---------------------|-----|--------------------|----|--------------------|-----|---------------------|----|---------------------|-----|---------------------|----|---------------------|
| JrERF24   | KGKLP AEATKRR AKKY- YRGV RQRPWGK WAAE IRDP | AT4G34410 | KAEGG KIRKRRKNKNG YRGV RQRPWGK FAAE IRDP | JrERF04   | --- RKP DTQRGGTRHPV FRGVRKR RSWGK VVSE IRP | JrERF08   | --- KKPI RQR- RTDFR FGVRKR SWGRK VVSE IRLP | JrERF07   | --- KRPR- VDCSKHPV FRGVRMR S WGWVSE IRP | JrERF13 | PDPKQPKRARDNSKHAV YRGV RMR SWGK VVSE IRP | JrERF39 | ENKKR VK- SRDDG KHPT YRGV RIRQW GKWVSE IRP | JrERF11 | SSRASSGQAASGGSPKYR GVRSR- SGKWVSE IRP | JrERF35 | SPKPAMASSSSSR-HPMYR GIRCR- SGKWVSE IRP | JrERF09 | S-----PAYR GVRKRK WGWVSE IRAP | JrERF10 | --- GANTGASTSQOKKYK GVRQRK WGWVSE IRVP | JrERF22 | KQMP SISISASASIKKKYK GVRMR S WGSVSE IRAP | JrERF18 | EREENRRKRQVEMCERP YKGI RMRK WGWVAAE IRP | JrERF42 | TSTSAEKRKQRNQEKPYRGI RMRK WGWVAAE IRP | JrERF33 | ACTSSTS GYINPCKKKLYR GVRQRH WGWVAAE IRLP | JrERF19 | -MVKQTTEKPAERSDSKYK GVRKRK WGWVSE IRLP | JrERF16 | KTIPMKHVGTSPKPAKLYR GVRQRH WGWVAAE IRLP | JrERF26 | KPIAMKHVGSPPKPTKLYR GVRQRH WGWVAAE IRLP | JrERF20 | -----MVQSK-KFRGVRQRH WGSVSE IRHP | AT1G15360 | -----MVQTK-KFRGVRQRH WGSVAAE IRHP | AT5G11190 | -----MVHSR-KFRGVRQRQ WGSVSE IRHP | AT5G25390 | -----MVHSK-KFRGVRQRQ WGSVSE IRHP | JrERF30 | -----MVHSK-KFRGVRQRQ WGSVSE IRHP | AT5G25130 | -----MARPQORFRGVRQRH WGSVSE IRHP | AT1G50640 | -----SVKEIRFRGVRKR P WGRFAAE IRDP | AT3G20310 | -----SVKEPRYR GVRKR P WGRFAAE IRDP | JrERF36 | -----PGNEPRYR GVRKR P WGRFAAE IRDP | JrERF12 | -----IIKEVKFRGVRKR P WGRFAAE IRDP | JrERF31 | -----AREGHRGVRKR P WGRYAAE IRDP | AT1G28360 | -----CAREVHYR GVRKR P WGRYAAE IRDP | JrERF14 | -----KRMAVHFRGVRKR P WGRFAAE IRDP | JrERF21 | -----KRREVHFRGVRKR P WGRFAAE IRDP | JrERF17 | -----KEMHYR GVRKR P WGRYAAE IRDP | JrERF40 | -----KEIRFRGVRKR P WGRYAAE IRDP | AT3G15210 | -----AKEIYR GVRKR P WGRYAAE IRDP | AT1G53170 | -----AAKEIYR GVRKR P WGRYAAE IRDP | JrERF32 | -----NGKEVHFRGVRKR P WGRYAAE IRDP | AT1G28370 | -----EGNGVRYR GVRKR P WGRYAAE IRDP | AT5G44210 | -----MRKEVHFRGVRKR P WGRYAAE IRDP | AT1G03800 | -----VNDGGEKSKEVRYR GVR R P WGRYAAE IRDP | AT1G12890 | -----KYLGVRRR P WGRYAAE IRNP | AT1G24590 | -----SGAGASGVSTIRYR GVR R P WGRYAAE IRDP | AT5G13910 | -----QVG-TRFLGVRRR P WGRYAAE IRDP | 0 | -----TTKERH WLGTFDTAE EEAALAYDRAARSMRGT | 180 | -----PRAKLNFP----- | 192 | -----PRAKLNFP----- | 100 | -----KAQLNFP----- | 101 | -----SACLNFP----- | 115 | -----SAVLNFP----- | 122 | -----SAILNFP----- | 130 | -----SAFLNFP----- | 131 | -----DTFLNFP----- | 124 | -----DAVLNFP----- | 70 | -----GTPLNFP----- | 79 | -----TLDNLNFP----- | 87 | -----KANLNFP----- | 82 | -----SARLNFP----- | 82 | -----SARLNFP----- | 174 | -----YARLNFPNLTDP SM | 74 | -----TAKFNFP E----- | 249 | -----FARLNFPHLKHQGA | 249 | -----FARLNFPNLRHQ-- | 70 | -----NAKTNFTQTSTG | 70 | -----NAKTNFPLNNNNTG | 70 | -----NAKTNFPVVKSEEG | 66 | -----SAKTNFPVIKSN-G | 68 | -----NAKTNFPTANGR-- | 69 | -----RARTNFPYNPA-- | 91 | -----KAKTNFPIDSSPP | 89 | -----KAKTNFPIDCS-PS | 99 | -----KAKTNFPLSPSSYF | 99 | -----KAKINFP LTA PQLA | 72 | -----KAKTNFPAPVTAGL | 75 | -----KAKTNFPPSPLSDL | 94 | -----KARTNFGLHGLVIT | 94 | -----KARTNFGLRGLVIT | 87 | -----KAKTNFPPSP-- | 84 | -----KAKTNFPNPSDDL T | 88 | -----KAKTNFP T FLELSD | 93 | -----KAKTNFGVIVGSS-- | 86 | -----KAKTNFPFGSDNVD | 121 | -----KAKTNFPCYINAH | 93 | -----KAKTNFPLPGE-- | 116 | -----KATTNFPLIGYYGI | 84 | -----LATTNFFYTENTSL | 121 | -----KARTNFVYPMPSLD | 83 | -----RARTNFVYSDMPPS |

ruler 0 ..... 270 ..... 280 ..... 290 ..... 300 ..... 310 ..... 320 ..... 330 ..... 340 ..... 350 ..... 360 .....

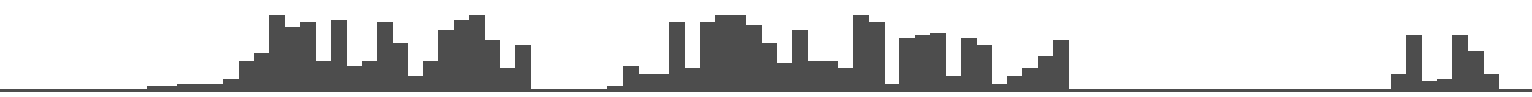

```

                                  * : : : : *                               ** : *
AT5G18560 -----QAEPGRFLGVRRRPWGRYAAEIRDP-----TTKERHWLGTFDTAHEAALAYDRAALSMRGT-----QARTNFVYTP TDVH   118
AT1G28160 -----HIEEIKYVGVRRRPWGRYAAEIRNP-----TTKERYWLGTFDTAEAAALAYDRAARSIRGL-----TARTNFVYS DMPRG   102
JrERF29  KKTPLKAQQQCI PDIKRYRGVRQRPWGRWAAEIRDP L-----RRTRVWLGT YDTAEAAAMVYDRAAIRL RGP-----DALTNFVKP P LSSP   182
AT2G46310 PAAAAENG GDLVKS VVKYRGVRQRPWGKFAAEIRDP S-----SRTRLWLGT FATAEEAAI GYDRAAIRI KHG-----NAQTNFLT P -----P   158
AT4G11140 --VPVVVT TAT-----RKFRGVRQRPWGK WAAEIRDP S-----RRVRVWLGT FDTAEAAA IVDNAAIQLRGP-----NAELNF-----   142
AT4G23750 TVSPVVSAT TTTTTEKKFRGVRQRPWGK WAAEIRDP L-----KRVRLWLGT YNTAEAAAMVYD NAAIQLRGP-----DALTNF SVTPTTAT   185
JrERF34  ESHRVLKVPGA-----RKFRGVRQRPWGK WAAEIRDP L-----RRIRLWLGT YDTAEAAAMVYD NAAIQLRGP-----DAFTNFA-----   171
AT1G22985 --ASLLAARNTTANKKKFRGVRQRPWGK WAAEIRCGR--VKGRPERIWLGT FETAEEAALAYD NAAIQLIGP-----DAPTNFG-----   134
AT1G71130 --AEFLKTAKT---EKKYRGVRQRPWGK WVAEIRCGRGACKGRRDRLWLGT FNTAEAAALAYD NASIKLIGP-----HAPTNFG-----   140
AT4G27950 VQKP---SVSGQNQKKYRGVRQRPWGK WAAEIRDP E-----QRRRIWLGT FATAEEAAI VYDNAAIKLRGP-----DALTNFTVQP-----   177
AT5G53290 RQRPNNKVSVSGQ- IKKFRGVRQRPWGK WAAEIRDP E-----QRRRIWLGT FETAEEAA VVYDNAAIRL RGP-----DALTNF SIPPQEEE   188
JrERF43  -----SSRRPSSSKYRGVRQRKWGK WAAEIRDP-----FKGAR IWLGT FNTPEEASEAY EKRLFEFESAMAAN-----ANSEKSKNKA AVSSAAVS   196
JrERF44  -----ARKRPSSSKYRGVRQRKWGK WAAEIRDP-----FKGAR IWLGT YNTPEEASEAY QRKRLF EFAAMTAN-----AASKSNNDA ASSSSAVA   192
AT1G25470 -----STRQFKYPVGV RPRPSGKFAAEILNP-----FTKTKKWLGT YETPAEAEKAYVD KKV EYDALASSG-----S---AVSSSVVT--VTS   146
AT1G68550 -----PAVPRKKPVGV RQRKWGK WAAEIRDP-----IKKTRTWLGT FDTLEEA AKAYDAKKLEF DAI VAGN-----V---STTKRDV S SSETS   180
AT3G25890 -----VGRSSTTVSKPVGV RQRKWGK WAAEIRHP-----ITKVRTWLGT YETLEQAADAYATKKLEF DALAAAT-----S---AASSVLSN-----   193
JrERF23  -----QPGGTMRYRGV RRRPWGRYAAEIRDP-----QSKERRWLGT FDTAE DAACAYDLAARAMRGLKARTNFVY PAPP PPSATD TFL PPFNF PRQSR RPA   109
AT1G80580 -----GRKMPQKTGGFMGV RKR PWGRWSAEIRDR-----IGRCRHWLGT FDTAE EAARAYDAAARRL RGT-----KAKTNFVIPP-----   175
AT5G19790 -----NKTKFVGVRQRPSGK WVAEIKDT-----TQKIRMWLGT FETAEEAARAYDEAAC LLRGS-----NTRTNFANHF PNNS   85
AT1G49120 -----RKTSSGFKV RRRPWGKFAAEIRNP-----FEKKRKWLGT FPTEEEAAEAY QKSKREFDERLG-----LVKQEKDLVDLTKPCGVRK   157
JrERF03  --KRHRRKLFQNQEPCLMRGVYYK-NMKWQAAIKVD-----KKQIHLGT VGSQE EAARLYDRAAFMCGRE-----PNFELSE-----   158
ruler  0.....270.....280.....290.....300.....310.....320.....330.....340.....350.....360.....

```

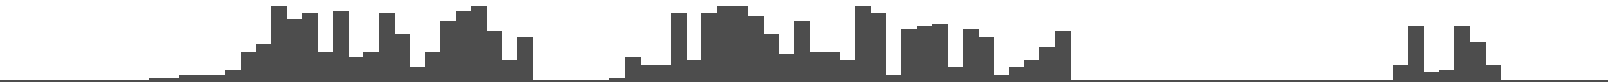

Supplement: Figure_S2.pdf [file Figure_S2.pdf]
