# Supplementary material for: Genome-wide identification and expression analysis of ethylene responsive factor family transcription factors in Juglans regia
Source: PeerJ journal article supplement (doi:10.7717/peerj.12429), 2021-11-19

AP2

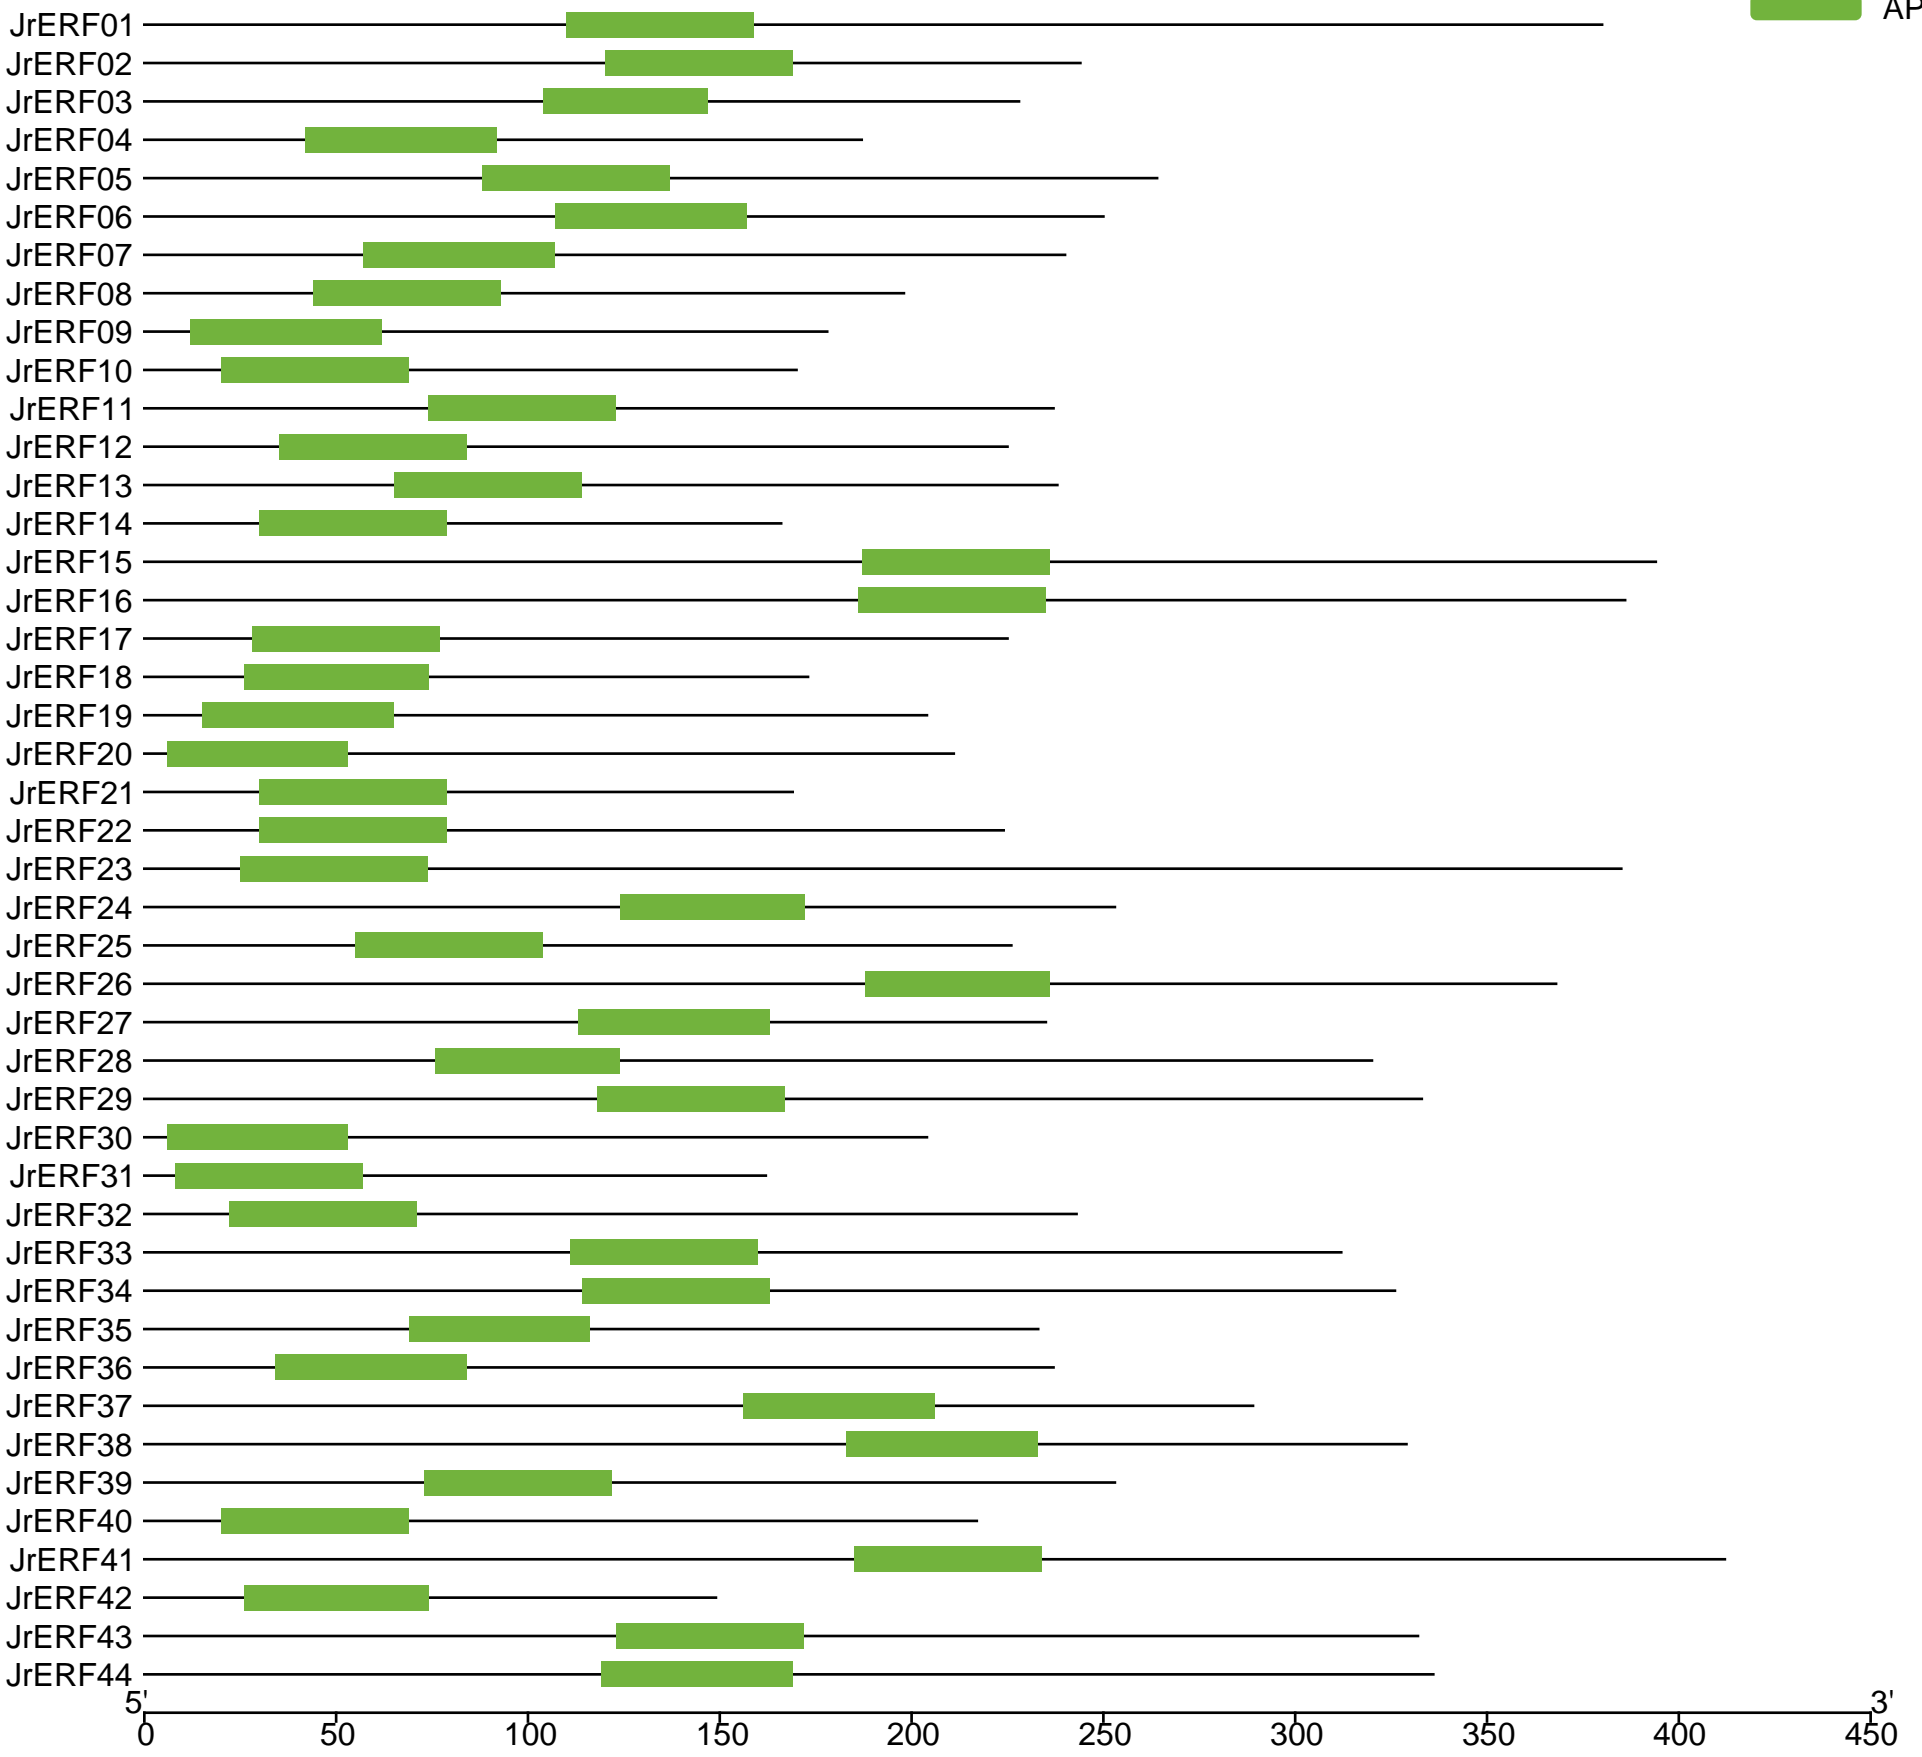

Supplement: Figure_S1.pdf [file Figure_S1.pdf]
