# Supplementary material for: Genome-wide identification and expression analysis of ethylene responsive factor family transcription factors in Juglans regia
Source: PeerJ. 2021 Nov 19;9:e12429. doi: 10.7717/peerj.12429 (PMC8607932; doi:10.7717/peerj.12429)
Supplement: Supplemental Information 5 [file peerj-09-12429-s005.xlsx]

## Sheet: PEG6000
Table S2 The qRT-PCR raw data under PEG6000 stress
Leaf
	PEG6000 (0 h)	PEG6000 (0 h)	PEG6000 (0 h)			PEG6000 (6 h)	PEG6000 (6 h)	PEG6000 (6 h)			PEG6000 (24 h)	PEG6000 (24 h)	PEG6000 (24 h)			PEG6000 (72 h)	PEG6000 (72 h)	PEG6000 (72 h)
18S	17.22	17.11	17.15		18S	17.36	17.45	17.29		18S	17.55	17.73	17.61		18S	17.78	17.61	17.78
JrERF01	20.52	20.47	20.61		JrERF01	17.88	17.69	17.76		JrERF01	18.19	18.29	18.57		JrERF01	19.73	19.67	19.58
JrERF02	18.95	19.05	19.08		JrERF02	19.05	19.13	18.95		JrERF02	17.69	17.94	17.81		JrERF02	17.19	17.15	17.22
JrERF03	19.18	19.23	19.31		JrERF03	18.85	18.96	19.06		JrERF03	17.84	17.91	17.88		JrERF03	17.29	17.13	17.23
JrERF04	19.15	19.03	19.22		JrERF04	17.11	17.33	17.25		JrERF04	19.02	18.89	18.95		JrERF04	17.35	17.29	17.39
JrERF05	20.17	20.31	20.25		JrERF05	17.19	17.12	17.25		JrERF05	18.47	18.66	18.53		JrERF05	19.38	19.22	19.27
JrERF06	18.96	18.79	18.88		JrERF06	17.29	17.33	17.16		JrERF06	19.35	19.45	19.2		JrERF06	17.28	17.63	17.39
JrERF07	22.15	22.11	22.35		JrERF07	17.82	17.96	17.79		JrERF07	18.96	19.11	19.05		JrERF07	19.66	19.35	19.51
JrERF08	19.31	19.22	19.15		JrERF08	17.52	17.68	17.48		JrERF08	18.69	18.84	18.74		JrERF08	17.14	17.22	17.31
JrERF09	21.15	21.05	21.18		JrERF09	19.22	19.03	19.11		JrERF09	18.36	18.56	18.43		JrERF09	19.06	19.11	19.19
JrERF10	21.33	21.24	21.19		JrERF10	19.66	19.43	19.52		JrERF10	18.15	18.33	18.25		JrERF10	18.96	19.06	19.15
JrERF11	22.03	21.97	22.15		JrERF11	17.67	17.86	17.72		JrERF11	18.39	18.5	18.42		JrERF11	21.65	21.5	21.63
JrERF12	18.63	18.56	18.71		JrERF12	19.1	19.03	19.15		JrERF12	18.53	18.73	18.63		JrERF12	17.68	17.35	17.53
JrERF13	21.86	21.81	21.95		JrERF13	17.39	17.48	17.51		JrERF13	19.33	19.46	19.38		JrERF13	20.15	19.89	19.98
JrERF14	20.66	20.58	20.68		JrERF14	17.25	17.21	17.19		JrERF14	18.3	18.42	18.38		JrERF14	19.75	19.56	19.61
JrERF15	19.68	19.52	19.67		JrERF15	18.61	18.39	18.43		JrERF15	18.03	17.92	18.09		JrERF15	17.52	17.39	17.44
JrERF16	19.28	19.12	19.18		JrERF16	19.18	19.11	19.27		JrERF16	17.88	17.89	17.67		JrERF16	17.31	17.22	17.15
JrERF17	19.06	19.02	19.15		JrERF17	19.45	19.22	19.31		JrERF17	18.26	18.41	18.36		JrERF17	17.38	17.19	17.24
JrERF18	19.23	19.14	19.28		JrERF18	19.56	19.43	19.42		JrERF18	18.24	18.42	18.35		JrERF18	17.18	17.36	17.25
JrERF19	21.06	21.03	21.14		JrERF19	19.28	19.17	19.25		JrERF19	18.55	18.76	18.63		JrERF19	19.41	19.25	19.33
JrERF20	21.06	21.01	21.19		JrERF20	19.41	19.27	19.34		JrERF20	18.03	18.24	18.1		JrERF20	19.1	19.21	19.17
JrERF21	20.06	20.12	20.25		JrERF21	17.32	17.15	17.25		JrERF21	18.27	18.38	18.29		JrERF21	19.66	19.43	19.55
JrERF22	20.58	20.48	20.64		JrERF22	17.34	17.53	17.43		JrERF22	18.33	18.55	18.49		JrERF22	19.86	19.75	19.65
JrERF23	18.97	18.93	19.15		JrERF23	19.37	19.18	19.2		JrERF23	18.19	18.33	18.25		JrERF23	17.42	17.52	17.33
JrERF24	19.15	19.31	19.22		JrERF24	19.11	19.03	19.18		JrERF24	17.88	17.93	17.75		JrERF24	17.3	17.21	17.29
JrERF25	21.52	21.37	21.47		JrERF25	19.55	19.63	19.59		JrERF25	17.96	18.15	18.05		JrERF25	19.11	19.02	19.25
JrERF26	19.33	19.17	19.26		JrERF26	19.27	19.15	19.22		JrERF26	17.83	17.93	17.7		JrERF26	17.37	17.18	17.25
JrERF27	20.11	20.26	20.15		JrERF27	18.75	18.85	18.69		JrERF27	18.15	18.31	18.23		JrERF27	17.25	17.33	17.31
JrERF28	20.33	20.26	20.35		JrERF28	17.65	17.85	17.79		JrERF28	18.21	18.43	18.34		JrERF28	19.25	19.11	19.11
JrERF29	20.38	20.51	20.44		JrERF29	19.35	19.22	19.37		JrERF29	18.33	18.59	18.42		JrERF29	19.23	19.3	19.17
JrERF30	21.34	21.23	21.25		JrERF30	19.57	19.37	19.42		JrERF30	17.93	18.16	18.05		JrERF30	18.93	18.69	18.78
JrERF31	19.35	19.15	19.27		JrERF31	18.74	18.63	18.85		JrERF31	17.88	18.06	17.93		JrERF31	17.18	17.03	17.09
JrERF32	20.85	20.74	20.87		JrERF32	19.31	19.15	19.24		JrERF32	18.66	18.89	18.72		JrERF32	19.36	19.11	19.25
JrERF33	19.66	19.54	19.71		JrERF33	18.55	18.76	18.66		JrERF33	18.06	18.16	18.12		JrERF33	17.36	17.28	17.29
JrERF34	20.63	20.55	20.71		JrERF34	19.23	19.12	19.24		JrERF34	18.12	18.28	18.05		JrERF34	19.03	18.91	18.85
JrERF35	22.14	22.07	22.09		JrERF35	18.04	17.86	17.95		JrERF35	18.57	18.75	18.64		JrERF35	19.86	20.16	20.04
JrERF36	18.55	18.51	18.66		JrERF36	18.95	18.75	19.03		JrERF36	18.33	18.56	18.43		JrERF36	17.25	17.11	17.29
JrERF37	18.77	18.85	18.91		JrERF37	18.8	18.69	18.81		JrERF37	17.52	17.79	17.62		JrERF37	17.43	17.27	17.33
JrERF38	19.36	19.31	19.28		JrERF38	18.69	18.51	18.77		JrERF38	17.68	17.85	17.71		JrERF38	17.38	17.19	17.26
JrERF39	19.23	19.11	19.28		JrERF39	18.63	18.55	18.78		JrERF39	17.85	17.93	17.72		JrERF39	17.52	17.44	17.31
JrERF40	20.96	20.86	20.97		JrERF40	19.17	19.05	19.13		JrERF40	18.72	18.87	18.65		JrERF40	19.28	19.03	19.18
JrERF41	18.79	18.69	18.83		JrERF41	17.35	17.62	17.48		JrERF41	19.17	19.31	19.26		JrERF41	17.26	17.11	17.18
JrERF42	19.52	19.42	19.58		JrERF42	19.33	19.22	19.28		JrERF42	17.95	18.09	18.03		JrERF42	17.44	17.26	17.31
JrERF43	21.58	21.39	21.44		JrERF43	17.59	17.69	17.42		JrERF43	19.61	19.84	19.75		JrERF43	20.66	20.51	20.77
JrERF44	21.66	21.56	21.75		JrERF44	17.58	17.88	17.62		JrERF44	18.86	18.91	18.74		JrERF44	21.75	21.69	21.5
	PEG6000 (6 h)	PEG6000 (24 h)	PEG6000 (72 h)
JrERF01	2.96334	2.65333	1.43666
JrERF02	0.190003	1.68333	2.40333
JrERF03	0.490003	1.83333	2.58666
JrERF04	2.11	0.65	2.35333
JrERF05	3.26334	2.16	1.51666
JrERF06	1.82334	0.0133333	2.00666
JrERF07	4.55334	3.63333	3.26
JrERF08	1.87334	0.94	2.56666
JrERF09	2.21334	3.14667	2.57
JrERF10	1.92334	3.48	2.76
JrERF11	4.50667	4.08333	1.02
JrERF12	-0.25333	0.473333	1.67666
JrERF13	4.62	2.95333	2.43
JrERF14	3.63	2.74333	1.56333
JrERF15	1.35334	2.08	2.73666
JrERF16	0.213337	1.85	2.53
JrERF17	-0.04333	1.20333	2.37
JrERF18	-0.0466633	1.35	2.51666
JrERF19	2.05	2.9	2.31
JrERF20	1.95334	3.43333	2.49
JrERF21	3.11	2.3	1.16
JrERF22	3.34	2.58	1.37666
JrERF23	-0.0266633	1.23	2.15666
JrERF24	0.32667	1.84333	2.52333
JrERF25	2.07	3.87	2.89
JrERF26	0.24667	1.90333	2.55
JrERF27	1.61667	2.41333	3.44
JrERF28	2.75667	2.45667	1.72
JrERF29	1.33667	2.46667	1.77333
JrERF30	2.02667	3.69667	3.03666
JrERF31	0.723337	1.77	2.72
JrERF32	1.79334	2.53333	2.14333
JrERF33	1.18667	1.99333	2.89
JrERF34	1.64	2.95	2.26333
JrERF35	4.35667	3.91667	2.64333
JrERF36	-0.129997	0.603333	1.92
JrERF37	0.283337	1.67	2.06333
JrERF38	0.86667	2.04	2.60333
JrERF39	0.760003	1.84333	2.34666
JrERF40	2.02	2.65333	2.33
JrERF41	1.49334	-0.00666667	2.15
JrERF42	0.43667	1.95333	2.73333
JrERF43	4.11	2.20667	1.38666
JrERF44	4.17	3.29	0.57333
These results are calculated by us.

## Sheet: Ethephon
Table S2 The qRT-PCR raw data under Ethephon (ETH) stress
Leaf
	Ethephon (0 h)	Ethephon (0 h)	Ethephon (0 h)			Ethephon (6 h)	Ethephon (6 h)	Ethephon (6 h)			Ethephon (24 h)	Ethephon (24 h)	Ethephon (24 h)			Ethephon (72 h)	Ethephon (72 h)	Ethephon (72 h)
18S	17.22	17.11	17.15		18S	17.26	17.33	17.18		18S	17.37	17.43	17.29		18S	17.56	17.44	17.62
JrERF01	20.52	20.47	20.61		JrERF01	17.56	17.45	17.58		JrERF01	18.03	18.27	18.15		JrERF01	18.51	18.74	18.66
JrERF02	18.95	19.05	19.08		JrERF02	19.5	19.36	19.57		JrERF02	18.23	18.03	18.15		JrERF02	17.35	17.21	17.45
JrERF03	19.18	19.23	19.31		JrERF03	19.27	19.15	19.31		JrERF03	18.11	18.35	18.22		JrERF03	17.54	17.69	17.39
JrERF04	19.15	19.03	19.22		JrERF04	17.33	17.18	17.22		JrERF04	19.33	19.39	19.29		JrERF04	17.63	17.89	17.73
JrERF05	20.17	20.31	20.25		JrERF05	17.01	17.13	17.18		JrERF05	18.31	18.26	18.39		JrERF05	18.96	19.08	18.89
JrERF06	18.96	18.79	18.88		JrERF06	17.48	17.35	17.61		JrERF06	19.62	19.87	19.75		JrERF06	17.36	17.49	17.25
JrERF07	22.15	22.11	22.35		JrERF07	17.96	17.75	17.83		JrERF07	19.34	19.54	19.41		JrERF07	19.87	19.91	19.78
JrERF08	19.31	19.22	19.15		JrERF08	17.86	17.68	17.77		JrERF08	18.95	19.13	19.05		JrERF08	17.25	17.38	17.19
JrERF09	21.15	21.05	21.18		JrERF09	19.03	18.84	18.96		JrERF09	18.53	18.68	18.49		JrERF09	18.89	19.08	18.79
JrERF10	21.33	21.24	21.19		JrERF10	19.32	19.18	19.24		JrERF10	18.49	18.59	18.38		JrERF10	18.56	18.69	18.43
JrERF11	22.03	21.97	22.15		JrERF11	17.88	17.64	17.79		JrERF11	19.63	19.78	19.59		JrERF11	21.36	21.28	21.29
JrERF12	18.63	18.56	18.71		JrERF12	18.96	19.05	19.17		JrERF12	18.15	18.31	18.22		JrERF12	17.52	17.43	17.35
JrERF13	21.86	21.81	21.95		JrERF13	17.52	17.35	17.44		JrERF13	19.51	19.66	19.41		JrERF13	20.43	20.35	20.49
JrERF14	20.66	20.58	20.68		JrERF14	17.03	17.15	17.21		JrERF14	18.18	18.31	18.22		JrERF14	19.13	19.51	19.28
JrERF15	19.68	19.52	19.67		JrERF15	19.05	18.85	18.95		JrERF15	18.32	18.16	18.21		JrERF15	17.65	17.51	17.72
JrERF16	19.28	19.12	19.18		JrERF16	19.34	19.2	19.42		JrERF16	18.37	18.56	18.45		JrERF16	17.61	17.75	17.51
JrERF17	19.06	19.02	19.15		JrERF17	19.12	18.89	19.03		JrERF17	18.03	18.31	18.24		JrERF17	17.21	17.31	17.08
JrERF18	19.23	19.14	19.28		JrERF18	19.24	18.96	19.08		JrERF18	17.86	18.03	17.95		JrERF18	17.05	17.18	17.14
JrERF19	21.06	21.03	21.14		JrERF19	19.03	18.79	18.91		JrERF19	18.87	18.95	18.78		JrERF19	19.12	19.25	19.18
JrERF20	21.06	21.01	21.19		JrERF20	19.11	19.03	19.19		JrERF20	18.28	18.18	18.32		JrERF20	18.69	18.75	18.53
JrERF21	20.06	20.12	20.25		JrERF21	17.11	17.25	17.18		JrERF21	18.11	18.24	18.06		JrERF21	19.25	19.31	19.05
JrERF22	20.58	20.48	20.64		JrERF22	17.12	17.24	17.18		JrERF22	18.1	18.26	18.16		JrERF22	19.52	19.84	19.68
JrERF23	18.97	18.93	19.15		JrERF23	19.03	18.85	18.96		JrERF23	17.96	18.15	18.05		JrERF23	17.19	17.25	17.06
JrERF24	19.15	19.31	19.22		JrERF24	19.62	19.48	19.55		JrERF24	18.15	18.28	18.19		JrERF24	17.63	17.49	17.59
JrERF25	21.52	21.37	21.47		JrERF25	19.24	19.12	19.18		JrERF25	18.41	18.69	18.57		JrERF25	18.79	18.89	18.62
JrERF26	19.33	19.17	19.26		JrERF26	19.67	19.55	19.72		JrERF26	18.22	18.5	18.41		JrERF26	17.59	17.68	17.49
JrERF27	20.11	20.26	20.15		JrERF27	19.54	19.38	19.45		JrERF27	18.77	18.61	18.58		JrERF27	17.42	17.36	17.51
JrERF28	20.33	20.26	20.35		JrERF28	17.45	17.36	17.29		JrERF28	18.03	18.35	18.22		JrERF28	19.03	19.21	19.15
JrERF29	20.38	20.51	20.44		JrERF29	19.11	18.96	19.05		JrERF29	18.65	18.87	18.71		JrERF29	18.86	18.94	18.76
JrERF30	21.34	21.23	21.25		JrERF30	19.22	19.17	19.31		JrERF30	18.34	18.26	18.19		JrERF30	18.72	18.88	18.68
JrERF31	19.35	19.15	19.27		JrERF31	19.34	19.21	19.38		JrERF31	18.33	18.15	18.22		JrERF31	17.39	17.25	17.45
JrERF32	20.85	20.74	20.87		JrERF32	19.14	19.31	19.2		JrERF32	18.96	18.76	18.89		JrERF32	19.03	19.16	19.08
JrERF33	19.66	19.54	19.71		JrERF33	19.11	19.03	19.18		JrERF33	18.65	18.4	18.51		JrERF33	17.65	17.51	17.69
JrERF34	20.63	20.55	20.71		JrERF34	18.95	19.21	19.17		JrERF34	18.56	18.77	18.61		JrERF34	18.75	18.89	18.65
JrERF35	22.14	22.07	22.09		JrERF35	18.33	18.16	18.22		JrERF35	18.69	18.86	18.71		JrERF35	20.11	20.19	20.04
JrERF36	18.55	18.51	18.66		JrERF36	18.75	18.66	18.89		JrERF36	18.32	18.21	18.39		JrERF36	17.13	17.19	17.02
JrERF37	18.77	18.85	18.91		JrERF37	19.45	19.31	19.51		JrERF37	17.84	17.69	17.73		JrERF37	17.84	17.65	17.7
JrERF38	19.36	19.31	19.28		JrERF38	19.15	19.03	19.22		JrERF38	17.95	17.73	17.86		JrERF38	17.54	17.38	17.49
JrERF39	19.23	19.11	19.28		JrERF39	19.25	19.15	19.29		JrERF39	18.32	18.11	18.22		JrERF39	17.68	17.44	17.59
JrERF40	20.96	20.86	20.97		JrERF40	18.89	18.69	18.77		JrERF40	19.12	19.05	18.96		JrERF40	19.12	19.25	19.05
JrERF41	18.79	18.69	18.83		JrERF41	17.63	17.43	17.56		JrERF41	19.51	19.68	19.45		JrERF41	17.42	17.64	17.55
JrERF42	19.52	19.42	19.58		JrERF42	19.51	19.36	19.42		JrERF42	18.11	18.31	18.19		JrERF42	17.74	17.85	17.69
JrERF43	21.58	21.39	21.44		JrERF43	17.69	17.51	17.73		JrERF43	19.85	19.89	19.71		JrERF43	21.03	21.26	21.11
JrERF44	21.66	21.56	21.75		JrERF44	17.68	17.43	17.51		JrERF44	19.23	19.37	19.28		JrERF44	21.65	21.39	21.48
	Ethephon (0 h)	Ethephon (24 h)	Ethephon (72 h)
JrERF01	3.1	2.58666	2.27667
JrERF02	-0.35333	1.09333	2.07
JrERF03	0.0933367	1.21666	2.08
JrERF04	1.98667	-3.33333e-06	1.76333
JrERF05	3.23334	2.12666	1.64667
JrERF06	1.49334	-0.66667	1.89
JrERF07	4.45334	2.97666	2.73
JrERF08	1.55334	0.386663	2.33333
JrERF09	2.28	2.76333	2.58667
JrERF10	2.10334	2.97	3.07333
JrERF11	4.37667	2.58666	1.12
JrERF12	-0.329997	0.609997	1.58
JrERF13	4.53334	2.55	1.83
JrERF14	3.60667	2.60666	1.71333
JrERF15	0.770003	1.59666	2.37667
JrERF16	-0.0299967	0.936663	1.95
JrERF17	0.160003	1.08666	2.25667
JrERF18	0.220003	1.47333	2.47333
JrERF19	2.26334	2.41333	2.27333
JrERF20	2.07334	3.03	2.81
JrERF21	3.06	2.21	1.32
JrERF22	3.48334	2.59666	1.26667
JrERF23	0.16667	1.16666	2.23
JrERF24	-0.226663	1.22333	2.03667
JrERF25	2.37	3.1	3.06667
JrERF26	-0.296663	1.08	2.04667
JrERF27	0.813337	1.72333	3.12333
JrERF28	3.04334	2.31666	1.56333
JrERF29	1.5	1.90333	1.97
JrERF30	2.13667	3.21333	2.89333
JrERF31	0.0433367	1.22666	2.27333
JrERF32	1.7	2.15333	2.11
JrERF33	0.62667	1.32	2.4
JrERF34	1.61667	2.18666	2.24667
JrERF35	3.96	3.55	2.36667
JrERF36	-0.0966633	0.469997	1.84
JrERF37	-0.48333	1.29333	1.49333
JrERF38	0.280003	1.67333	2.22667
JrERF39	0.0733367	1.19333	2.01667
JrERF40	2.24334	2.09	2.17
JrERF41	1.32667	-0.573337	1.61333
JrERF42	0.173337	1.50666	2.12667
JrERF43	3.92334	1.85666	0.716667
JrERF44	4.21334	2.56666	0.53
These results are calculated by us.

## Sheet: PEG6000+Ethephon
Table S2 The qRT-PCR raw data under PEG6000+ETH stress
Leaf
	PEG6000+Ethephon (0 h)	PEG6000+Ethephon (0 h)	PEG6000+Ethephon (0 h)			PEG6000+Ethephon (6 h)	PEG6000+Ethephon (6 h)	PEG6000+Ethephon (6 h)			PEG6000+Ethephon (24 h)	PEG6000+Ethephon (24 h)	PEG6000+Ethephon (24 h)			PEG6000+Ethephon (72 h)	PEG6000+Ethephon (72 h)	PEG6000+Ethephon (72 h)
18S	17.22	17.11	17.15		18S	18.22	18.13	18.36		18S	18.65	18.75	18.88		18S	18.89	18.75	18.96
JrERF01	20.52	20.47	20.61		JrERF01	16.55	16.69	16.45		JrERF01	17.03	17.19	17.06		JrERF01	18.35	18.19	18.44
JrERF02	18.95	19.05	19.08		JrERF02	18.46	18.53	18.36		JrERF02	17.05	17.16	17.34		JrERF02	16.56	16.49	16.78
JrERF03	19.18	19.23	19.31		JrERF03	18.23	18.19	18.12		JrERF03	17.13	17.33	17.19		JrERF03	16.63	16.59	16.77
JrERF04	19.15	19.03	19.22		JrERF04	16.72	16.89	16.68		JrERF04	18.34	17.96	18.18		JrERF04	16.75	16.89	16.63
JrERF05	20.17	20.31	20.25		JrERF05	16.96	16.89	16.91		JrERF05	17.25	17.35	17.18		JrERF05	18.12	18.01	18.25
JrERF06	18.96	18.79	18.88		JrERF06	16.82	16.76	16.91		JrERF06	18.75	18.36	18.59		JrERF06	16.71	16.89	16.66
JrERF07	22.15	22.11	22.35		JrERF07	17.26	17.36	16.96		JrERF07	18.33	18.57	18.49		JrERF07	19.06	18.78	18.89
JrERF08	19.31	19.22	19.15		JrERF08	17.03	16.88	16.75		JrERF08	18.05	17.95	18.22		JrERF08	16.63	16.78	16.59
JrERF09	21.15	21.05	21.18		JrERF09	18.12	18.25	18.05		JrERF09	17.21	17.34	17.13		JrERF09	17.86	17.69	17.89
JrERF10	21.33	21.24	21.19		JrERF10	18.53	18.69	18.48		JrERF10	17.03	17.19	17.08		JrERF10	17.67	17.78	17.81
JrERF11	22.03	21.97	22.15		JrERF11	17.21	17.13	17.35		JrERF11	17.64	17.81	17.58		JrERF11	21.04	21.31	21.15
JrERF12	18.63	18.56	18.71		JrERF12	18.05	18.16	18.15		JrERF12	17.22	17.43	17.11		JrERF12	16.58	16.69	16.46
JrERF13	21.86	21.81	21.95		JrERF13	16.95	17.25	17.11		JrERF13	18.15	18.36	18.27		JrERF13	19.37	19.25	19.44
JrERF14	20.66	20.58	20.68		JrERF14	16.33	16.51	16.48		JrERF14	17.11	17.29	17.19		JrERF14	18.22	18.14	18.36
JrERF15	19.68	19.52	19.67		JrERF15	18.16	18.36	18.26		JrERF15	17.38	17.56	17.42		JrERF15	16.89	16.71	17.06
JrERF16	19.28	19.12	19.18		JrERF16	18.76	18.55	18.61		JrERF16	17.18	17.28	17.05		JrERF16	16.65	16.75	16.91
JrERF17	19.06	19.02	19.15		JrERF17	18.34	18.51	18.4		JrERF17	17.03	17.19	17.15		JrERF17	16.62	16.71	16.57
JrERF18	19.23	19.14	19.28		JrERF18	18.43	18.59	18.34		JrERF18	16.86	17.16	17.04		JrERF18	16.49	16.59	16.32
JrERF19	21.06	21.03	21.14		JrERF19	18.18	18.05	18.35		JrERF19	17.25	17.38	17.11		JrERF19	17.96	17.81	18.11
JrERF20	21.06	21.01	21.19		JrERF20	18.27	18.18	18.36		JrERF20	16.89	17.05	16.95		JrERF20	17.89	17.96	17.68
JrERF21	20.06	20.12	20.25		JrERF21	16.85	17.15	16.94		JrERF21	17.12	17.31	17.22		JrERF21	18.5	18.6	18.42
JrERF22	20.58	20.48	20.64		JrERF22	16.65	16.77	16.51		JrERF22	17.08	17.11	17.19		JrERF22	18.31	18.14	18.46
JrERF23	18.97	18.93	19.15		JrERF23	18.27	18.36	18.16		JrERF23	17.05	17.21	17.16		JrERF23	16.74	16.81	16.61
JrERF24	19.15	19.31	19.22		JrERF24	18.63	18.49	18.51		JrERF24	17.24	17.43	17.36		JrERF24	16.73	16.56	16.81
JrERF25	21.52	21.37	21.47		JrERF25	18.56	18.46	18.28		JrERF25	16.87	17.06	16.75		JrERF25	17.75	17.59	17.81
JrERF26	19.33	19.17	19.26		JrERF26	18.89	18.95	18.74		JrERF26	17.28	17.39	17.21		JrERF26	16.71	16.53	16.89
JrERF27	20.11	20.26	20.15		JrERF27	18.23	18.19	18.05		JrERF27	17.79	17.65	17.85		JrERF27	16.65	16.58	16.79
JrERF28	20.33	20.26	20.35		JrERF28	16.77	16.84	16.69		JrERF28	16.89	17.03	17.05		JrERF28	18.03	18.19	18.16
JrERF29	20.38	20.51	20.44		JrERF29	18.15	18.03	18.25		JrERF29	17.13	17.22	16.96		JrERF29	17.85	17.69	17.7
JrERF30	21.34	21.23	21.25		JrERF30	18.39	18.25	18.48		JrERF30	16.73	16.89	16.68		JrERF30	17.69	17.71	17.78
JrERF31	19.35	19.15	19.27		JrERF31	18.22	18.39	18.13		JrERF31	17.24	17.38	17.19		JrERF31	16.48	16.39	16.55
JrERF32	20.85	20.74	20.87		JrERF32	18.21	18.18	18.31		JrERF32	17.35	17.49	17.26		JrERF32	18.05	17.84	17.95
JrERF33	19.66	19.54	19.71		JrERF33	18.05	18.26	18.15		JrERF33	17.38	17.25	17.44		JrERF33	16.77	16.65	16.88
JrERF34	20.63	20.55	20.71		JrERF34	18.31	18.22	18.39		JrERF34	16.96	17.17	17.03		JrERF34	17.63	17.48	17.75
JrERF35	22.14	22.07	22.09		JrERF35	17.45	17.31	17.59		JrERF35	17.95	18.21	18.13		JrERF35	19.13	19.34	19.06
JrERF36	18.55	18.51	18.66		JrERF36	17.86	18.11	18.03		JrERF36	17.11	17.28	17		JrERF36	16.51	16.65	16.48
JrERF37	18.77	18.85	18.91		JrERF37	18.31	18.28	18.18		JrERF37	16.98	17.13	17.03		JrERF37	16.87	16.68	16.94
JrERF38	19.36	19.31	19.28		JrERF38	18.13	18.33	18.26		JrERF38	17.12	17.35	17.03		JrERF38	16.79	16.59	16.83
JrERF39	19.23	19.11	19.28		JrERF39	18.11	18.26	18.13		JrERF39	17.25	17.11	17.29		JrERF39	16.86	16.75	16.95
JrERF40	20.96	20.86	20.97		JrERF40	18.05	18.16	18.19		JrERF40	17.48	17.62	17.36		JrERF40	18.03	17.85	17.91
JrERF41	18.79	18.69	18.83		JrERF41	16.91	16.89	16.89		JrERF41	18.61	18.51	18.76		JrERF41	16.67	16.84	16.59
JrERF42	19.52	19.42	19.58		JrERF42	18.76	18.87	18.61		JrERF42	17.31	17.45	17.28		JrERF42	16.84	16.61	16.71
JrERF43	21.58	21.39	21.44		JrERF43	17.03	16.85	16.97		JrERF43	19.03	18.89	19.15		JrERF43	19.91	19.78	20.05
JrERF44	21.66	21.56	21.75		JrERF44	17.11	16.95	17.03		JrERF44	18.25	18.36	18.44		JrERF44	21.13	21.25	21.05
	PEG6000+Ethephon (6 h)	PEG6000+Ethephon (24 h)	PEG6000+Ethephon (72 h)
JrERF01	5.04667	5.04	3.91334
JrERF02	1.65334	3.44333	4.12334
JrERF03	2.13667	3.62333	4.28334
JrERF04	3.44667	2.57333	4.08334
JrERF05	4.4	4.58333	3.82334
JrERF06	3.12334	1.91	3.83
JrERF07	6.08667	5.34	5
JrERF08	3.41667	2.75333	4.26667
JrERF09	4.06334	5.5	5.02
JrERF10	3.76334	5.75333	5.20667
JrERF11	5.89667	5.97333	2.59
JrERF12	1.59	2.98	3.76334
JrERF13	5.84667	5.21333	4.22667
JrERF14	5.27667	5.04333	4.10667
JrERF15	2.44	3.77	4.44334
JrERF16	1.63	3.62333	4.13
JrERF17	1.73667	3.55333	4.15
JrERF18	1.84	3.79667	4.45667
JrERF19	3.96	5.43	4.82334
JrERF20	3.89334	5.72333	4.95
JrERF21	4.24	4.52667	3.34334
JrERF22	5	5.04	3.97
JrERF23	1.83	3.47667	4.00334
JrERF24	1.76	3.48333	4.23334
JrERF25	4.09667	6.16	5.44334
JrERF26	1.47	3.56	4.25
JrERF27	3.09334	4.01	5.20667
JrERF28	4.62334	4.92333	3.89334
JrERF29	3.37667	4.94	4.40334
JrERF30	3.97667	6.10667	5.25334
JrERF31	2.08667	3.58667	4.49
JrERF32	3.66334	5.05333	4.58
JrERF33	2.56	3.88	4.57667
JrERF34	3.4	5.17667	4.71667
JrERF35	5.72667	5.60333	4.63
JrERF36	1.65	3.04333	3.73334
JrERF37	1.66334	3.39667	3.72
JrERF38	2.15334	3.75	4.28667
JrERF39	2.11667	3.59	4.06
JrERF40	3.87334	5.04333	4.70667
JrERF41	2.95	1.74333	3.77667
JrERF42	1.83667	3.76	4.49334
JrERF43	5.59667	4.04667	3.26334
JrERF44	5.70334	4.90667	2.22
These results are calculated by us.
