# Supplementary material for: Genome-wide identification and expression analysis of ethylene responsive factor family transcription factors in Juglans regia
Source: PeerJ. 2021 Nov 19;9:e12429. doi: 10.7717/peerj.12429 (PMC8607932; doi:10.7717/peerj.12429)
Supplement: Supplemental Information 6 [file peerj-09-12429-s006.xlsx]

## Sheet: Sheet1
Table S3. Full information of the JrERFs from transcriptome annotation including Gene Ontology
Gene name	Transcriptome number	Gene Length	NR GI	NR ID	NR Score	NR Evalue	NR Description	NT GI	NT ID	NT Score	NT Evalue	NT Description	KO ID	KO Name	KO Description	Http Link	Swissprot ID	Swissprot Score	Swissprot Evalue	Swissprot Description	PFAM ID	PFAM description	Gene Ontology Biological Pathway	BP Description	Gene Ontology Molecular Function	MF Description	Gene Ontology Cellular Component	CC Description	KOG ID	KOG Description
JrERF01	comp22717_c0	1870	297845974	XP_002890868.1	957	4.66034e-117	ATMRP13 [Arabidopsis lyrata subsp. lyrata]	123697781	AM457080.1	75	2.59133e-29	Vitis vinifera, whole genome shotgun sequence, contig VV78X126886.10, clone ENTAV 115	K09286	EREBP	EREBP-like factor	http://www.genome.jp/dbget-bin/www_bget?ko:K09286	O88563	140	9.62388e-09	Canalicular multispecific organic anion transporter 2 OS=Rattus norvegicus GN=Abcc3 PE=2 SV=1	PF00847	AP2 domain	GO:0006355	regulation of transcription, DNA-dependent	GO:0003677//GO:0003700	DNA binding//sequence-specific DNA binding transcription factor activity	GO:0005634//GO:0005667	nucleus//transcription factor complex	--	--
JrERF02	comp2477_c0	1043	356529791	XP_003533471.1	1837	0	PREDICTED: uncharacterized protein LOC100785027 [Glycine max]	224138427	XM_002326564.1	397	0	Populus trichocarpa predicted protein, mRNA	--	--	--	--	Q9R9N1	132	5.32582e-07	Lipopolysaccharide core biosynthesis glycosyltransferase LpsE OS=Rhizobium meliloti (strain 1021) GN=lpsE PE=3 SV=1	PF00847//PF04272	AP2 domain//Phospholamban	GO:0006816//GO:0006355//GO:0006810	calcium ion transport//regulation of transcription, DNA-dependent//transport	GO:0042030//GO:0005246//GO:0003700	ATPase inhibitor activity//calcium channel regulator activity//sequence-specific DNA binding transcription factor activity	GO:0005667//GO:0016020	transcription factor complex//membrane	--	--
JrERF03	comp25333_c0	1565	296084578	CBI25599.3	124	3.87493e-06	unnamed protein product [Vitis vinifera]	189163093	AP010327.1	73	3.83249e-28	Lotus japonicus genomic DNA, chromosome 4, clone: LjB21L22, BM1890, complete sequence	--	--	--	--	O04136	117	2.13532e-06	Homeobox protein knotted-1-like 3 OS=Malus domestica PE=2 SV=1	PF02115//PF00847	RHO protein GDP dissociation inhibitor//AP2 domain	GO:0006355	regulation of transcription, DNA-dependent	GO:0003700//GO:0003677//GO:0005094	sequence-specific DNA binding transcription factor activity//DNA binding//Rho GDP-dissociation inhibitor activity	GO:0005737//GO:0005667	cytoplasm//transcription factor complex	--	--
JrERF04	comp18721_c0	822	297744202	CBI37172.3	1153	8.13422e-149	unnamed protein product [Vitis vinifera]	115452810	NM_001056541.1	114	1.6607e-50	Oryza sativa Japonica Group Os03g0329900 (Os03g0329900) mRNA, complete cds	K09286	EREBP	EREBP-like factor	http://www.genome.jp/dbget-bin/www_bget?ko:K09286	Q940D0	166	1.03169e-10	Two-component response regulator ARR1 OS=Arabidopsis thaliana GN=ARR1 PE=1 SV=2	PF00847	AP2 domain	GO:0006355	regulation of transcription, DNA-dependent	GO:0003700	sequence-specific DNA binding transcription factor activity	GO:0005667	transcription factor complex	--	--
JrERF05	comp9598_c0	1185	387016030	AFJ50134.1	127	3.66061e-06	Lymphocyte antigen 6 complex locus protein G6d-like [Crotalus adamanteus]	225459674	XM_002285848.1	277	1.87622e-141	PREDICTED: Vitis vinifera NAD(P)H-quinone oxidoreductase subunit M, chloroplastic (NDHM), mRNA	K09286	EREBP	EREBP-like factor	http://www.genome.jp/dbget-bin/www_bget?ko:K09286	P33628	270	3.38021e-30	Tubulin alpha chain (Fragment) OS=Picea abies GN=TUBA PE=3 SV=1	PF01096//PF00847	Transcription factor S-II (TFIIS)//AP2 domain	GO:0006351//GO:0006355	transcription, DNA-dependent//regulation of transcription, DNA-dependent	GO:0008270//GO:0003676//GO:0003700	zinc ion binding//nucleic acid binding//sequence-specific DNA binding transcription factor activity	GO:0005667	transcription factor complex	--	--
JrERF06	comp22552_c1	1101	166343843	ABY86664.1	273	1.99864e-27	beta-tubulin 18 [Gossypium hirsutum]	5737711	AF080078.1	51	2.31911e-15	Betula alleghaniensis ribosomal protein small 3 (rps3) gene, partial cds; mitochondrial gene for mitochondrial product	K14516	ERF1	ethylene-responsive transcription factor 1	http://www.genome.jp/dbget-bin/www_bget?ko:K14516	P18025	263	3.64718e-27	Tubulin beta-1 chain OS=Zea mays GN=TUBB1 PE=2 SV=1	PF00847	AP2 domain	GO:0006355	regulation of transcription, DNA-dependent	GO:0003700	sequence-specific DNA binding transcription factor activity	GO:0005667	transcription factor complex	--	--
JrERF07	comp8892_c0	996	296084653	CBI25776.3	881	6.38504e-117	unnamed protein product [Vitis vinifera]	255571106	XM_002526458.1	222	6.68429e-111	Ricinus communis protein with unknown function, mRNA	--	--	--	--	Q1KME6	701	2.18822e-90	Ras-related protein Rab-6A OS=Gallus gallus GN=RAB6A PE=2 SV=3	PF09026//PF00847//PF00060	Centromere protein B dimerisation domain//AP2 domain//Ligand-gated ion channel	GO:0007268//GO:0007165//GO:0006811//GO:0006355	synaptic transmission//signal transduction//ion transport//regulation of transcription, DNA-dependent	GO:0004970//GO:0005234//GO:0003700//GO:0003677//GO:0003682	ionotropic glutamate receptor activity//extracellular-glutamate-gated ion channel activity//sequence-specific DNA binding transcription factor activity//DNA binding//chromatin binding	GO:0016020//GO:0000785//GO:0005667//GO:0005634//GO:0000775	membrane//chromatin//transcription factor complex//nucleus//chromosome, centromeric region	--	--
JrERF08	comp44754_c0	794	124359898	ABD33348.2	286	1.42623e-28	IMP dehydrogenase/GMP reductase, putative [Medicago truncatula]	391417882	BT088138.2	53	1.09626e-16	Zea mays full-length cDNA clone ZM_BFc0032K08 mRNA, complete cds	--	--	--	--	O22230	402	2.58344e-43	Heat stress transcription factor B-3 OS=Arabidopsis thaliana GN=HSFB3 PE=2 SV=1	PF00847	AP2 domain	GO:0006355	regulation of transcription, DNA-dependent	GO:0003700	sequence-specific DNA binding transcription factor activity	GO:0005667	transcription factor complex	--	--
JrERF09	comp8896_c0	641	356507218	XP_003522366.1	2675	0	PREDICTED: transmembrane 9 superfamily member 4-like [Glycine max]	225315528	AK321681.1	775	0	Solanum lycopersicum cDNA, clone: LEFL1027CC11, HTC in leaf	--	--	--	--	Q5R8Y6	1319	1.33026e-167	Transmembrane 9 superfamily member 2 OS=Pongo abelii GN=TM9SF2 PE=2 SV=1	PF00847	AP2 domain	GO:0006355	regulation of transcription, DNA-dependent	GO:0003700//GO:0003677	sequence-specific DNA binding transcription factor activity//DNA binding	GO:0005634//GO:0005667	nucleus//transcription factor complex	--	--
JrERF10	comp13191_c0	803	395542075	XP_003772960.1	368	1.0287e-43	PREDICTED: 60S ribosomal protein L34-like [Sarcophilus harrisii]	388515664	BT146100.1	456	0	Lotus japonicus clone JCVI-FLLj-3D4 unknown mRNA	--	--	--	--	P45842	174	8.92693e-16	60S ribosomal protein L34 OS=Aedes albopictus GN=RpL34 PE=2 SV=2	PF00847	AP2 domain	GO:0006355//GO:0006351	regulation of transcription, DNA-dependent//transcription, DNA-dependent	GO:0003700	sequence-specific DNA binding transcription factor activity	GO:0005667	transcription factor complex	--	--
JrERF11	comp10222_c0	1072	12322039	AAG51062.1	1642	0	arginine N-methyltransferase 3, putative; 35335-37803 [Arabidopsis thaliana]	242044071	XM_002459862.1	85	2.33553e-34	Sorghum bicolor hypothetical protein, mRNA	--	--	--	--	Q28F07	564	6.50423e-64	Protein arginine N-methyltransferase 1 OS=Xenopus tropicalis GN=prmt1 PE=2 SV=1	PF00847	AP2 domain	GO:0006355	regulation of transcription, DNA-dependent	GO:0003700	sequence-specific DNA binding transcription factor activity	GO:0005667	transcription factor complex	--	--
JrERF12	comp22357_c0	1797	356520342	XP_003528822.1	952	4.95533e-120	PREDICTED: sufE-like protein, chloroplastic-like [Glycine max]	147803487	AM484444.2	181	8.82239e-88	Vitis vinifera contig VV78X083775.4, whole genome shotgun sequence	K09286	EREBP	EREBP-like factor	http://www.genome.jp/dbget-bin/www_bget?ko:K09286	Q66A23	180	8.24939e-14	Cysteine desulfuration protein SufE OS=Yersinia pseudotuberculosis serotype I (strain IP32953) GN=sufE PE=3 SV=1	PF07469//PF00847	Domain of unknown function (DUF1518)//AP2 domain	GO:0006355	regulation of transcription, DNA-dependent	GO:0003700	sequence-specific DNA binding transcription factor activity	GO:0005667//GO:0005634	transcription factor complex//nucleus	--	--
JrERF13	comp24921_c1	1292	255571190	XP_002526545.1	1015	1.0088e-126	Ras-GTPase-activating protein-binding protein, putative [Ricinus communis]	356575199	XM_003555682.1	376	0	PREDICTED: Glycine max uncharacterized protein LOC100817177 (LOC100817177), mRNA	K09286	EREBP	EREBP-like factor	http://www.genome.jp/dbget-bin/www_bget?ko:K09286	Q9UN86	149	1.20913e-08	Ras GTPase-activating protein-binding protein 2 OS=Homo sapiens GN=G3BP2 PE=1 SV=2	PF00847	AP2 domain	GO:0006355	regulation of transcription, DNA-dependent	GO:0003700	sequence-specific DNA binding transcription factor activity	GO:0005667	transcription factor complex	--	--
JrERF14	comp15973_c0	937	356556686	XP_003546654.1	1074	2.91162e-132	PREDICTED: serine/threonine protein phosphatase 2A 55 kDa regulatory subunit B beta isoform-like [Glycine max]	358349223	XM_003638591.1	269	1.68171e-136	Medicago truncatula Serine/threonine protein phosphatase 2A 55 kDa regulatory subunit B beta isoform (MTR_138s0037) mRNA, complete cds	--	--	--	--	Q66LE6	510	1.9554e-54	Serine/threonine-protein phosphatase 2A 55 kDa regulatory subunit B delta isoform OS=Homo sapiens GN=PPP2R2D PE=1 SV=1	PF00847	AP2 domain	GO:0006355	regulation of transcription, DNA-dependent	GO:0003700	sequence-specific DNA binding transcription factor activity	GO:0005667	transcription factor complex	--	--
JrERF15	comp16155_c0	1488	430800811	4B2G	2615	0	Chain A, Crystal Structure Of An Indole-3-acetic Acid Amido Synthase From Vitis Vinifera Involved In Auxin Homeostasis	357136592	XM_003569840.1	132	2.244e-60	PREDICTED: Brachypodium distachyon probable indole-3-acetic acid-amido synthetase GH3.2-like (LOC100833271), mRNA	--	--	--	--	Q8LQM5	1945	0	Probable indole-3-acetic acid-amido synthetase GH3.1 OS=Oryza sativa subsp. japonica GN=GH3.1 PE=2 SV=1	PF00847//PF07820	AP2 domain//TraC-like protein	GO:0006355//GO:0000746	regulation of transcription, DNA-dependent//conjugation	GO:0003700	sequence-specific DNA binding transcription factor activity	GO:0005667	transcription factor complex	--	--
JrERF16	comp23695_c0	2136	89887334	ABD78322.1	218	1.42253e-18	polyprotein [Primula vulgaris]	7406444	AL162875.1	35	1.19566e-06	Arabidopsis thaliana DNA chromosome 5, BAC clone T32M21 (ESSA project)	K09286	EREBP	EREBP-like factor	http://www.genome.jp/dbget-bin/www_bget?ko:K09286	Q84TE6	414	6.12975e-44	NAC domain-containing protein 21/22 OS=Arabidopsis thaliana GN=NAC021 PE=1 SV=2	PF11593//PF00847	Mediator complex subunit 3 fungal//AP2 domain	GO:0006355//GO:0006357	regulation of transcription, DNA-dependent//regulation of transcription from RNA polymerase II promoter	GO:0001104//GO:0003700	RNA polymerase II transcription cofactor activity//sequence-specific DNA binding transcription factor activity	GO:0005667//GO:0016592	transcription factor complex//mediator complex	--	--
JrERF17	comp12993_c0	1151	242056161	XP_002457226.1	196	2.56317e-15	hypothetical protein SORBIDRAFT_03g003610 [Sorghum bicolor]	225319712	AK324273.1	162	4.41445e-77	Solanum lycopersicum cDNA, clone: LEFL1075AC08, HTC in leaf	--	--	--	--	P40096	117	2.97531e-06	Negative cofactor 2 complex subunit alpha OS=Saccharomyces cerevisiae (strain ATCC 204508 / S288c) GN=BUR6 PE=1 SV=1	PF00847	AP2 domain	GO:0006355	regulation of transcription, DNA-dependent	GO:0003700	sequence-specific DNA binding transcription factor activity	GO:0005667	transcription factor complex	--	--
JrERF18	comp27438_c0	746	359478116	XP_003632072.1	2253	0	PREDICTED: probable E3 ubiquitin-protein ligase ARI7-like [Vitis vinifera]	255547475	XM_002514749.1	569	0	Ricinus communis Protein ariadne-1, putative, mRNA	K09286	EREBP	EREBP-like factor	http://www.genome.jp/dbget-bin/www_bget?ko:K09286	Q9P3U4	605	4.16113e-67	Uncharacterized RING finger protein C328.02 OS=Schizosaccharomyces pombe (strain 972 / ATCC 24843) GN=SPAC328.02 PE=2 SV=1	PF00847	AP2 domain	GO:0006355//GO:0006351	regulation of transcription, DNA-dependent//transcription, DNA-dependent	GO:0003700	sequence-specific DNA binding transcription factor activity	GO:0005667	transcription factor complex	--	--
JrERF19	comp9852_c0	1254	357511795	XP_003626186.1	4255	0	hypothetical protein MTR_7g112460 [Medicago truncatula]	326513013	AK372216.1	244	1.84035e-122	Hordeum vulgare subsp. vulgare mRNA for predicted protein, complete cds, clone: NIASHv2148C08	--	--	--	--	Q8YV57	134	2.2313e-06	Uncharacterized WD repeat-containing protein all2124 OS=Nostoc sp. (strain PCC 7120 / UTEX 2576) GN=all2124 PE=4 SV=1	PF00847	AP2 domain	GO:0006355	regulation of transcription, DNA-dependent	GO:0003700	sequence-specific DNA binding transcription factor activity	GO:0005667	transcription factor complex	--	--
JrERF20	comp18782_c0	869	317374910	B4FHY0.1	1508	0	RecName: Full=Flap endonuclease 1; Short=FEN-1; AltName: Full=Flap structure-specific endonuclease 1	147838421	AM451152.2	47	2.23812e-13	Vitis vinifera contig VV78X013054.24, whole genome shotgun sequence	--	--	--	--	B8AMS4	1240	1.51018e-165	Flap endonuclease 1-B OS=Oryza sativa subsp. indica GN=FEN1b PE=3 SV=1	PF00847	AP2 domain	GO:0006355	regulation of transcription, DNA-dependent	GO:0003700	sequence-specific DNA binding transcription factor activity	GO:0005667	transcription factor complex	--	--
JrERF21	comp55856_c0	726	357496231	XP_003618404.1	4641	0	ABC transporter B family member [Medicago truncatula]	123704356	AM474763.1	139	4.50133e-64	Vitis vinifera, whole genome shotgun sequence, contig VV78X210342.3, clone ENTAV 115	--	--	--	--	Q9C7F8	891	5.45284e-98	ABC transporter B family member 13 OS=Arabidopsis thaliana GN=ABCB13 PE=3 SV=1	PF11057//PF00847	Cortexin of kidney//AP2 domain	GO:0006355	regulation of transcription, DNA-dependent	GO:0003700	sequence-specific DNA binding transcription factor activity	GO:0005667//GO:0031224	transcription factor complex//intrinsic to membrane	--	--
JrERF22	comp22253_c0	850	15383744	AAK73756.1	2518	0	delta-1-pyrroline-5-carboxylate dehydrogenase precursor [Arabidopsis thaliana]	357477460	XM_003608968.1	693	0	Medicago truncatula Delta-1-pyrroline-5-carboxylate dehydrogenase 1 protein (MTR_4g107940) mRNA, complete cds	--	--	--	--	P94428	198	1.10462e-14	Succinate-semialdehyde dehydrogenase [NADP(+)] OS=Bacillus subtilis (strain 168) GN=gabD PE=1 SV=1	PF01213//PF00847	Adenylate cyclase associated (CAP) N terminal//AP2 domain	GO:0006355//GO:0007010	regulation of transcription, DNA-dependent//cytoskeleton organization	GO:0003700//GO:0003779	sequence-specific DNA binding transcription factor activity//actin binding	GO:0005667	transcription factor complex	--	--
JrERF23	comp26055_c0	1444	356569350	XP_003552865.1	5854	0	PREDICTED: pattern formation protein EMB30-like [Glycine max]	104294909	AC184064.2	1493	0	Populus trichocarpa clone Pop1-109C22, complete sequence	--	--	--	--	Q9P7R8	722	8.49549e-76	Uncharacterized protein C211.03 OS=Schizosaccharomyces pombe (strain 972 / ATCC 24843) GN=SPBC211.03c PE=1 SV=1	PF00847	AP2 domain	GO:0006355	regulation of transcription, DNA-dependent	GO:0003700	sequence-specific DNA binding transcription factor activity	GO:0005667	transcription factor complex	--	--
JrERF24	comp10353_c0	1224	224076832	XP_002305013.1	308	3.94839e-26	predicted protein [Populus trichocarpa]	359485536	XM_002272072.2	138	1.19284e-63	PREDICTED: Vitis vinifera protein CHUP1, chloroplastic-like (LOC100255089), mRNA	--	--	--	--	Q1PEB4	367	1.24111e-34	Uncharacterized protein At4g04980 OS=Arabidopsis thaliana GN=At4g04980 PE=2 SV=1	PF00847	AP2 domain	GO:0006355	regulation of transcription, DNA-dependent	GO:0003700	sequence-specific DNA binding transcription factor activity	GO:0005667	transcription factor complex	--	--
JrERF25	comp26003_c0	1417	359493273	XP_002272034.2	897	1.07723e-105	PREDICTED: TMV resistance protein N-like [Vitis vinifera]	224922941	AC235177.1	43	1.07598e-11	Glycine max strain Williams 82 clone GM_WBb0007H11, complete sequence	--	--	--	--	Q9SYC9	203	1.3805e-15	Vesicle-associated protein 1-4 OS=Arabidopsis thaliana GN=PVA14 PE=2 SV=1	PF00847	AP2 domain	GO:0006355	regulation of transcription, DNA-dependent	GO:0003700	sequence-specific DNA binding transcription factor activity	GO:0005667	transcription factor complex	--	--
JrERF26	comp25379_c1	2072	297791187	XP_002863478.1	182	2.18732e-13	hypothetical protein ARALYDRAFT_494437 [Arabidopsis lyrata subsp. lyrata]	224097537	XM_002310942.1	186	5.05934e-91	Populus trichocarpa predicted protein, mRNA	K09286	EREBP	EREBP-like factor	http://www.genome.jp/dbget-bin/www_bget?ko:K09286	Q9LS44	349	1.279e-37	Protein PLANT CADMIUM RESISTANCE 4 OS=Arabidopsis thaliana GN=PCR4 PE=3 SV=1	PF00847	AP2 domain	GO:0006355	regulation of transcription, DNA-dependent	GO:0003700	sequence-specific DNA binding transcription factor activity	GO:0005667	transcription factor complex	--	--
JrERF27	comp18282_c0	890	413925035	AFW64967.1	793	1.40151e-100	hypothetical protein ZEAMMB73_666367 [Zea mays]	170763666	AC215456.2	83	1.80594e-33	Solanum lycopersicum chromosome 2 clone C02SLe0057O21, complete sequence	--	--	--	--	Q9SBN5	256	6.32016e-25	Photosystem I reaction center subunit N, chloroplastic OS=Volvox carteri GN=PSAN PE=2 SV=1	PF00847//PF01465	AP2 domain//GRIP domain	GO:0000042//GO:0006355	protein targeting to Golgi//regulation of transcription, DNA-dependent	GO:0005515//GO:0003700	protein binding//sequence-specific DNA binding transcription factor activity	GO:0005667	transcription factor complex	--	--
JrERF28	comp29196_c0	1399	224142804	XP_002324737.1	357	1.99344e-38	predicted protein [Populus trichocarpa]	356550409	XM_003543532.1	36	6.69755e-08	PREDICTED: Glycine max eukaryotic initiation factor 4A-10-like (LOC100777628), mRNA	--	--	--	--	P41377	319	2.84036e-34	Eukaryotic initiation factor 4A-2 OS=Arabidopsis thaliana GN=TIF4A-2 PE=1 SV=1	PF00847	AP2 domain	GO:0006355	regulation of transcription, DNA-dependent	GO:0003700	sequence-specific DNA binding transcription factor activity	GO:0005667	transcription factor complex	--	--
JrERF29	comp40170_c0	1619	15240891	NP_195731.1	143	9.47784e-07	pentatricopeptide repeat-containing protein [Arabidopsis thaliana]	57012521	AC134606.4	34	2.44483e-06	Mus musculus BAC clone RP23-52K6 from 9, complete sequence	--	--	--	--	Q9CAN5	239	1.2351e-19	Pentatricopeptide repeat-containing protein At1g63080, mitochondrial OS=Arabidopsis thaliana GN=At1g63080 PE=2 SV=1	PF00847	AP2 domain	GO:0006355	regulation of transcription, DNA-dependent	GO:0003700	sequence-specific DNA binding transcription factor activity	GO:0005667	transcription factor complex	--	--
JrERF30	comp10012_c0	1006	255537629	XP_002509881.1	762	1.05563e-96	conserved hypothetical protein [Ricinus communis]	60280854	AY789270.1	33	2.10495e-06	Malus x domestica major allergen Mal d 1.03E (Mal d 1.03E) gene, Mal d 1.03E02 allele, complete cds gi|60460780|gb|AY822730.1| Malus x domestica clone 231103B4 Mal d 1.03E01 (Mal d 1.03E) gene, Mal d 1.03E01 allele, complete cds	--	--	--	--	Q6NPD8	355	3.49371e-38	Reticulon-like protein B10 OS=Arabidopsis thaliana GN=RTNLB10 PE=2 SV=1	PF00806//PF00847	Pumilio-family RNA binding repeat//AP2 domain	GO:0006355	regulation of transcription, DNA-dependent	GO:0003700//GO:0003723	sequence-specific DNA binding transcription factor activity//RNA binding	GO:0005667	transcription factor complex	--	--
JrERF31	comp14427_c0	851	297843944	XP_002889853.1	145	4.01495e-07	predicted protein [Arabidopsis lyrata subsp. lyrata]	186478360	NM_100989.4	238	1.90226e-119	Arabidopsis thaliana uncharacterized protein (AT1G11170) mRNA, complete cds	--	--	--	--	Q9C698	141	1.93332e-08	Filament-like plant protein 6 OS=Arabidopsis thaliana GN=FPP6 PE=2 SV=1	PF00847	AP2 domain	GO:0006355	regulation of transcription, DNA-dependent	GO:0003700	sequence-specific DNA binding transcription factor activity	GO:0005667	transcription factor complex	--	--
JrERF32	comp9632_c0	1358	147783384	CAN70815.1	706	1.96659e-87	hypothetical protein VITISV_042944 [Vitis vinifera]	123651461	AM440162.1	127	2.20071e-58	Vitis vinifera, whole genome shotgun sequence, contig VV78X054233.12, clone ENTAV 115	--	--	--	--	Q8LQM5	470	3.59513e-54	Probable indole-3-acetic acid-amido synthetase GH3.1 OS=Oryza sativa subsp. japonica GN=GH3.1 PE=2 SV=1	PF00847	AP2 domain	GO:0006351//GO:0006355	transcription, DNA-dependent//regulation of transcription, DNA-dependent	GO:0003700	sequence-specific DNA binding transcription factor activity	GO:0005667	transcription factor complex	--	--
JrERF33	comp26703_c0	1736	297811679	XP_002873723.1	636	4.50761e-76	hypothetical protein ARALYDRAFT_488387 [Arabidopsis lyrata subsp. lyrata]	357502126	XM_003621304.1	129	1.70521e-59	Medicago truncatula Cyclic nucleotide-gated ion channel (MTR_7g012260) mRNA, complete cds	--	--	--	--	Q9S9N5	195	3.1593e-16	Putative cyclic nucleotide-gated ion channel 7 OS=Arabidopsis thaliana GN=CNGC7 PE=2 SV=1	PF00847	AP2 domain	GO:0006355	regulation of transcription, DNA-dependent	GO:0003700	sequence-specific DNA binding transcription factor activity	GO:0005667	transcription factor complex	--	--
JrERF34	comp23499_c0	1298	356535404	XP_003536235.1	1623	0	PREDICTED: benzyl alcohol O-benzoyltransferase-like [Glycine max]	224126150	XM_002319731.1	125	1.44277e-56	Populus trichocarpa predicted protein, mRNA	--	--	--	--	Q9FPW3	461	1.21091e-48	2-alpha-hydroxytaxane 2-O-benzoyltransferase OS=Taxus cuspidata PE=1 SV=1	PF00847	AP2 domain	GO:0006355	regulation of transcription, DNA-dependent	GO:0003700	sequence-specific DNA binding transcription factor activity	GO:0005667	transcription factor complex	--	--
JrERF35	comp53300_c0	1033	413953209	AFW85858.1	243	7.10572e-20	hypothetical protein ZEAMMB73_026841 [Zea mays]	356506141	XM_003521798.1	319	2.72839e-164	PREDICTED: Glycine max ankyrin repeat-containing protein At5g02620-like (LOC100802559), partial mRNA	--	--	--	--	Q94AG2	120	3.03656e-07	Somatic embryogenesis receptor kinase 1 OS=Arabidopsis thaliana GN=SERK1 PE=1 SV=2	PF00847	AP2 domain	GO:0006355	regulation of transcription, DNA-dependent	GO:0003700	sequence-specific DNA binding transcription factor activity	GO:0005667	transcription factor complex	--	--
JrERF36	comp20406_c0	1523	388496098	AFK36115.1	301	4.92383e-33	unknown [Lotus japonicus]	169244135	CU633473.4	36	3.52575e-07	M.truncatula DNA sequence from clone MTH2-75F6 on chromosome 3, complete sequence	K09286	EREBP	EREBP-like factor	http://www.genome.jp/dbget-bin/www_bget?ko:K09286	A2XK56	202	5.1748e-19	Probable E3 ubiquitin-protein ligase BAH1-like 1 OS=Oryza sativa subsp. indica GN=OsI_12825 PE=3 SV=1	PF00847	AP2 domain	GO:0006355	regulation of transcription, DNA-dependent	GO:0003700	sequence-specific DNA binding transcription factor activity	GO:0005667	transcription factor complex	--	--
JrERF37	comp21129_c0	1431	255542374	XP_002512250.1	273	5.81261e-25	transcription regulator, putative [Ricinus communis]	449517905	XM_004165937.1	62	6.89818e-22	PREDICTED: Cucumis sativus dnaJ homolog subfamily B member 6-A-like, transcript variant 1 (LOC101229542), mRNA	--	--	--	--	O35723	174	3.48026e-13	DnaJ homolog subfamily B member 3 OS=Mus musculus GN=Dnajb3 PE=2 SV=1	PF00847	AP2 domain	GO:0006355	regulation of transcription, DNA-dependent	GO:0003700	sequence-specific DNA binding transcription factor activity	GO:0005667	transcription factor complex	KOG3544	Collagens (type IV and type XIII), and related proteins
JrERF38	comp18221_c1	1327	297833070	XP_002884417.1	844	3.85326e-109	hypothetical protein ARALYDRAFT_896410 [Arabidopsis lyrata subsp. lyrata]	224103746	XM_002313142.1	132	1.00264e-60	Populus trichocarpa predicted protein, mRNA	K09286	EREBP	EREBP-like factor	http://www.genome.jp/dbget-bin/www_bget?ko:K09286	O06735	531	1.34655e-63	Probable adenylyl-sulfate kinase OS=Bacillus subtilis (strain 168) GN=yisZ PE=3 SV=2	PF10399//PF00847	Ubiquitinol-cytochrome C reductase Fe-S subunit TAT signal//AP2 domain	GO:0006355//GO:0015992//GO:0006119//GO:0006118//GO:0055114	regulation of transcription, DNA-dependent//proton transport//oxidative phosphorylation//electron transport//oxidation-reduction process	GO:0008121//GO:0003700	ubiquinol-cytochrome-c reductase activity//sequence-specific DNA binding transcription factor activity	GO:0005667	transcription factor complex	--	--
JrERF39	comp23713_c0	1262	242087921	XP_002439793.1	570	1.77864e-133	hypothetical protein SORBIDRAFT_09g020180 [Sorghum bicolor]	224053229	XM_002297691.1	202	2.46996e-99	Populus trichocarpa predicted protein, mRNA	--	--	--	--	Q4PSA3	312	1.3851e-28	65-kDa microtubule-associated protein 9 OS=Arabidopsis thaliana GN=MAP65-9 PE=2 SV=1	PF00847	AP2 domain	GO:0006355	regulation of transcription, DNA-dependent	GO:0003700	sequence-specific DNA binding transcription factor activity	GO:0005667	transcription factor complex	--	--
JrERF40	comp29151_c0	1133	57282792	CAF18434.1	690	4.1427e-85	E3 ubiquitin ligase [Oryza sativa Indica Group]	162809361	AC215897.1	36	2.42617e-07	Populus trichocarpa clone POP034-F24, complete sequence	K09286	EREBP	EREBP-like factor	http://www.genome.jp/dbget-bin/www_bget?ko:K09286	Q6IV56	130	2.74368e-07	RING finger protein 141 OS=Danio rerio GN=rnf141 PE=2 SV=2	PF00847	AP2 domain	GO:0006355	regulation of transcription, DNA-dependent	GO:0003700	sequence-specific DNA binding transcription factor activity	GO:0005667	transcription factor complex	--	--
JrERF41	comp22664_c0	1969	147837894	CAN62820.1	142	4.58383e-07	hypothetical protein VITISV_013243 [Vitis vinifera]	349717970	FQ381173.1	122	4.10879e-55	Vitis vinifera clone SS0ACG1YD06	--	--	--	--	Q9XAC0	665	2.85022e-82	Transaldolase 2 OS=Streptomyces coelicolor (strain ATCC BAA-471 / A3(2) / M145) GN=tal2 PE=3 SV=1	PF00847	AP2 domain	GO:0006355	regulation of transcription, DNA-dependent	GO:0003700	sequence-specific DNA binding transcription factor activity	GO:0005667	transcription factor complex	--	--
JrERF42	comp28472_c0	1402	224069605	XP_002303010.1	124	1.57712e-06	predicted protein [Populus trichocarpa]	110665783	AC160097.28	74	9.33491e-29	Medicago truncatula clone mth2-182a12, complete sequence	K09286	EREBP	EREBP-like factor	http://www.genome.jp/dbget-bin/www_bget?ko:K09286	Q47SC3	131	3.67382e-08	Glutamyl-tRNA(Gln) amidotransferase subunit A OS=Thermobifida fusca (strain YX) GN=gatA PE=3 SV=1	PF00847	AP2 domain	GO:0006355	regulation of transcription, DNA-dependent	GO:0003700	sequence-specific DNA binding transcription factor activity	GO:0005667	transcription factor complex	--	--
JrERF43	comp17398_c0	1793	356510114	XP_003523785.1	1729	0	PREDICTED: DUF246 domain-containing protein At1g04910-like [Glycine max]	349706108	FQ384647.1	309	4.24498e-159	Vitis vinifera clone SS0AAG16YM01	--	--	--	--	Q8W486	579	9.71821e-67	Uncharacterized protein At1g04910 OS=Arabidopsis thaliana GN=At1g04910 PE=1 SV=1	PF00847//PF10471//PF02932	AP2 domain//Anaphase-promoting complex APC subunit 1//Neurotransmitter-gated ion-channel transmembrane region	GO:0006355//GO:0006811//GO:0030071//GO:0031145	regulation of transcription, DNA-dependent//ion transport//regulation of mitotic metaphase/anaphase transition//anaphase-promoting complex-dependent proteasomal ubiquitin-dependent protein catabolic process	GO:0003700	sequence-specific DNA binding transcription factor activity	GO:0005680//GO:0005667//GO:0016020	anaphase-promoting complex//transcription factor complex//membrane	--	--
JrERF44	comp21821_c0	2045	75136741	Q704V3.1	281	4.16495e-28	RecName: Full=Protein LOL5; AltName: Full=OsLOL2; AltName: Full=Protein LSD ONE LIKE 5; Short=OsLOL5; AltName: Full=Putative zinc finger LOL5	147784270	AM472381.2	187	6.77658e-91	Vitis vinifera contig VV78X087035.51, whole genome shotgun sequence	--	--	--	--	Q84UR0	162	9.84594e-13	Protein LOL4 OS=Oryza sativa subsp. japonica GN=LOL4 PE=2 SV=1	PF11801//PF00847	Tom37 C-terminal domain//AP2 domain	GO:0006626//GO:0006355	protein targeting to mitochondrion//regulation of transcription, DNA-dependent	GO:0003700	sequence-specific DNA binding transcription factor activity	GO:0005667//GO:0005741	transcription factor complex//mitochondrial outer membrane	--	--
